# Supplementary material
Source: PubMed Central journal article supplement (PMC2077067)
Supplement: pnas_0706273104_3.pdf [file pnas_0706273104_3.pdf]

**Table 1. Mean duration ( $\pm 95\%$  confidence interval) of epochs in the movements performed by the experimenter for the two groups of participants in experiment 1**

| Children | Reach               |                     | Grasp               |                     | Bring               |                     |
|----------|---------------------|---------------------|---------------------|---------------------|---------------------|---------------------|
|          | Eat                 | Place               | Eat                 | Place               | Eat                 | Place               |
| Autistic | 0.64 ( $\pm 0.03$ ) | 0.60 ( $\pm 0.01$ ) | 0.18 ( $\pm 0.05$ ) | 0.13 ( $\pm 0.02$ ) | 0.73 ( $\pm 0.05$ ) | 0.73 ( $\pm 0.05$ ) |
| TD       | 0.65 ( $\pm 0.08$ ) | 0.63 ( $\pm 0.07$ ) | 0.22 ( $\pm 0.10$ ) | 0.18 ( $\pm 0.09$ ) | 0.75 ( $\pm 0.06$ ) | 0.73 ( $\pm 0.04$ ) |
