# Supplementary material
Source: PubMed Central journal article supplement (PMC2077067)
Supplement: pnas_0706273104_4.pdf [file pnas_0706273104_4.pdf]

**Table 2. Mean duration (95% confidence interval) of epochs in the two groups of participants in experiment 2**

| Children | Reach               |                     | Grasp               |                     | Bring               |                     |
|----------|---------------------|---------------------|---------------------|---------------------|---------------------|---------------------|
|          | Eat                 | Place               | Eat                 | Place               | Eat                 | Place               |
| Autistic | 0.91 ( $\pm 0.14$ ) | 0.85 ( $\pm 0.15$ ) | 0.31 ( $\pm 0.10$ ) | 0.30 ( $\pm 0.13$ ) | 1.06 ( $\pm 0.17$ ) | 0.98 ( $\pm 0.14$ ) |
| TD       | 0.90 ( $\pm 0.12$ ) | 0.82 ( $\pm 0.13$ ) | 0.24 ( $\pm 0.08$ ) | 0.17 ( $\pm 0.06$ ) | 1.03 ( $\pm 0.15$ ) | 0.98 ( $\pm 0.14$ ) |
