# Supplementary material
Source: PubMed Central journal article supplement (PMC2077067)
Supplement: pnas_0706273104_5.pdf [file pnas_0706273104_5.pdf]

**Table 3. Mean duration (95% confidence interval) of epochs in the two groups of participants in experiment 3**

| Children | Reach               |                     | Grasp               |                     | Bring               |                     |
|----------|---------------------|---------------------|---------------------|---------------------|---------------------|---------------------|
|          | Pedal               | Nonpedal            | Pedal               | Nonpedal            | Pedal               | Nonpedal            |
| Autistic | 0.58 ( $\pm 0.09$ ) | 0.67 ( $\pm 0.13$ ) | 0.23 ( $\pm 0.03$ ) | 0.28 ( $\pm 0.10$ ) | 0.68 ( $\pm 0.11$ ) | 0.65 ( $\pm 0.09$ ) |
| TD       | 0.58 ( $\pm 0.12$ ) | 0.63 ( $\pm 0.17$ ) | 0.14 ( $\pm 0.05$ ) | 0.15 ( $\pm 0.07$ ) | 0.71 ( $\pm 0.07$ ) | 0.68 ( $\pm 0.07$ ) |
