# Supplementary material
Source: PubMed Central journal article supplement (PMC2077067)
Supplement: pnas_0706273104_6.pdf [file pnas_0706273104_6.pdf]

**Table 4. Clinical and psychological data of the eight autistic children**

| Subject (initials) | Sex | Age (years.months) | IQ  | ADOS score (module)* | ADI-R social subscale score | Language development‡ | Motor development |        | Neurological examination |
|--------------------|-----|--------------------|-----|----------------------|-----------------------------|-----------------------|-------------------|--------|--------------------------|
|                    |     |                    |     |                      |                             |                       | Gross             | Fine   |                          |
| GB                 | M   | 6.8                | 85  | 10 (2)               | 10                          | N-L                   | N                 | Clumsy | N                        |
| AM                 | M   | 6.11               | 104 | 10 (3)               | 15                          | N                     | N-L               | Clumsy | N                        |
| GN                 | F   | 5.9                | 80  | 12 (2)               | 23                          | L                     | N-L               | Clumsy | N                        |
| DM                 | M   | 6.1                | 106 | 8 (2)                | 14                          | L                     | L                 | N      | N                        |
| MM                 | M   | 7.11               | 110 | 17 (3)               | 16                          | L                     | N-L               | N      | N                        |
| AP                 | M   | 5.1                | 91  | 10 (2)               | 6                           | L                     | N                 | N      | N                        |
| GF                 | M   | 6.1                | 93  | 10 (3)               | 13                          | L                     | N                 | N      | N                        |
| LC                 | M   | 9.1                | 110 | 7 (4)                | 13                          | L                     | N-L               | Clumsy | N                        |

\*Cutoff of ADOS: module 2: from 8 to 12 spectrum disorder, above 12 autism; modules 3 and 4: from 7 to 10 spectrum disorder, above 10, autism.

† Cutoff ADI-R = 10.

‡ N, normal. N-L, normal-late. L, late.

§ Obtained in the period of the present work.
