# Supplementary material
Source: PubMed Central journal article supplement (PMC2077067)
Supplement: pnas_0706273104_7.pdf [file pnas_0706273104_7.pdf]

**Table 5. Mean percentage of discarded trials in the two groups in the three experiments, for each condition**

| Action            | Mean no. of discarded trials, % |             |
|-------------------|---------------------------------|-------------|
|                   | Autistic children               | TD children |
| Experiment 1      |                                 |             |
| Grasping to eat   | 11                              | 9           |
| Grasping to place | 11                              | 11          |
| Experiment 2      |                                 |             |
| Grasping to eat   | 8                               | 9           |
| Grasping to place | 9                               | 15          |
| Experiment 3      |                                 |             |
| Pedal action      | 13                              | 3           |
| Open container    | 8                               | 8           |
