# Supplementary material
Source: PubMed Central journal article supplement (PMC2077067)

## action observation

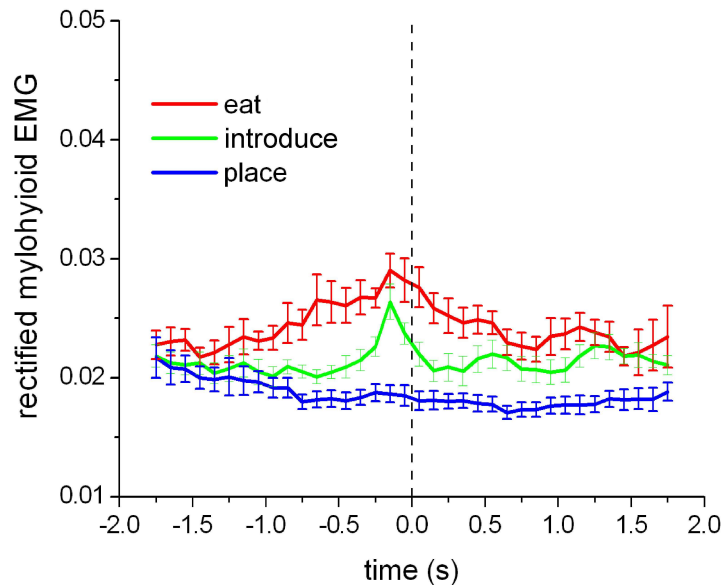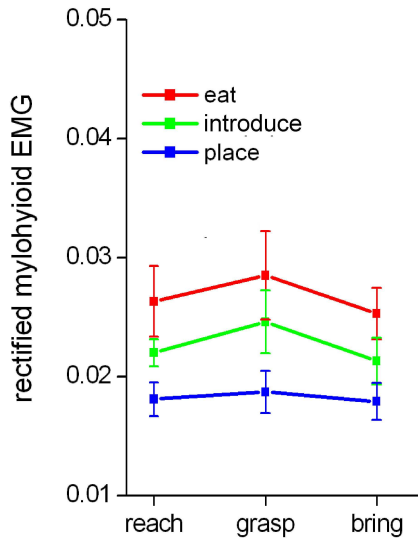

## action execution

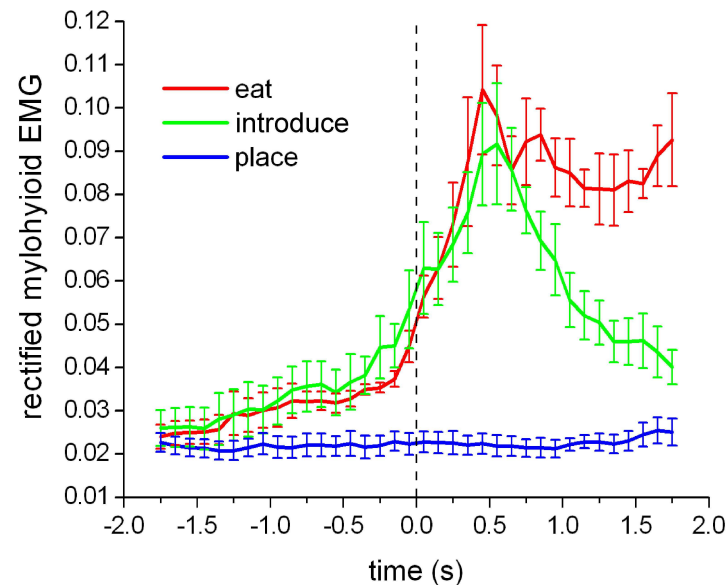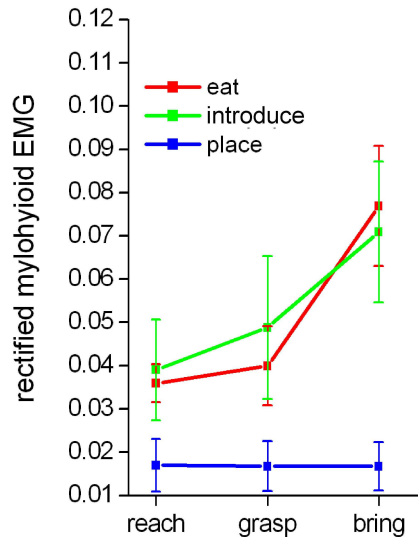

Supplement: pnas_0706273104_1.pdf [file pnas_0706273104_1.pdf]

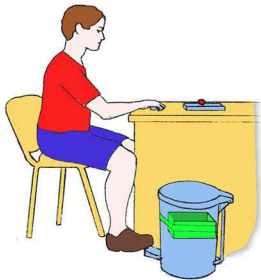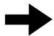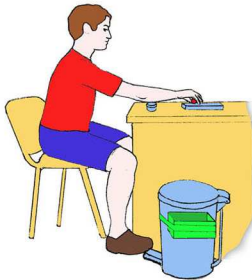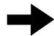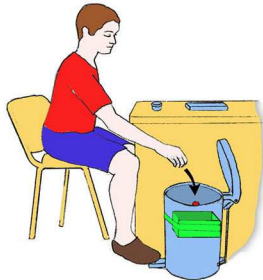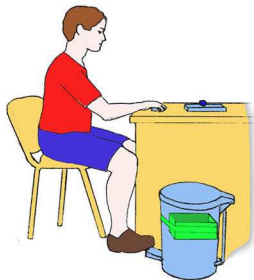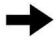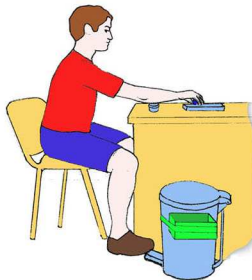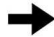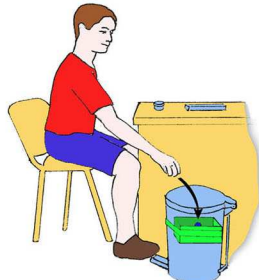

Supplement: pnas_0706273104_2.pdf [file pnas_0706273104_2.pdf]
